# Supplementary material
Source: PubMed Central journal article supplement (PMC3262653)

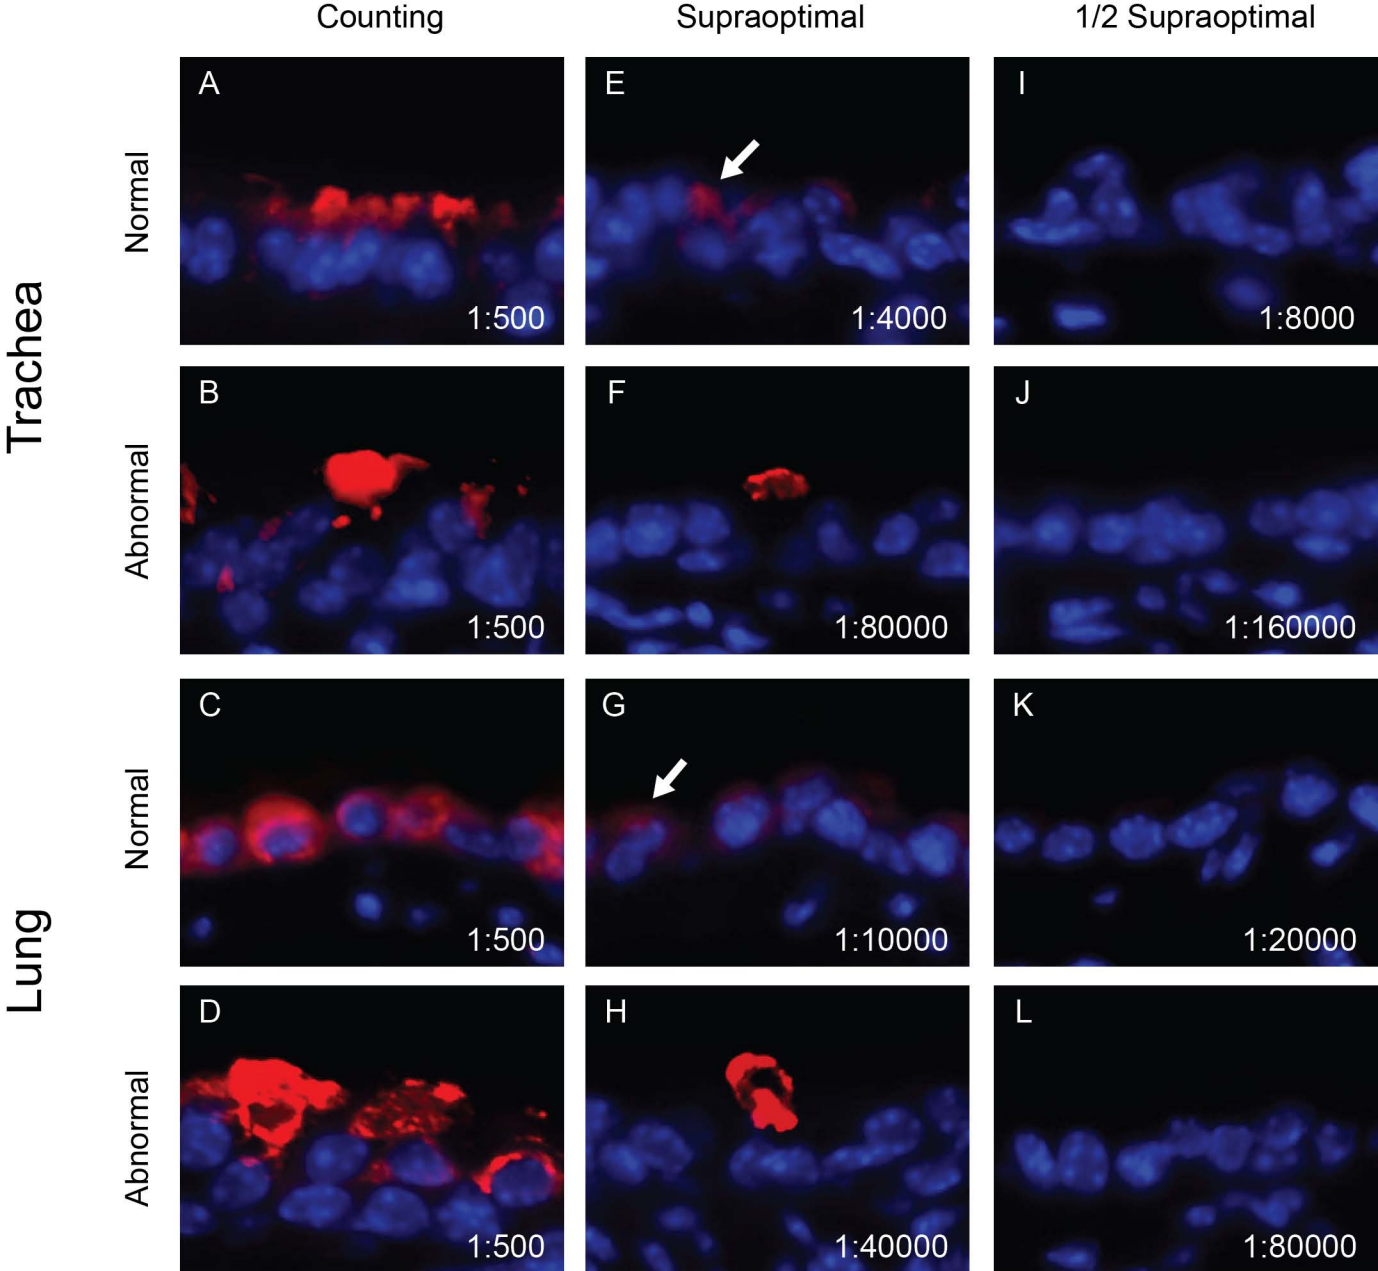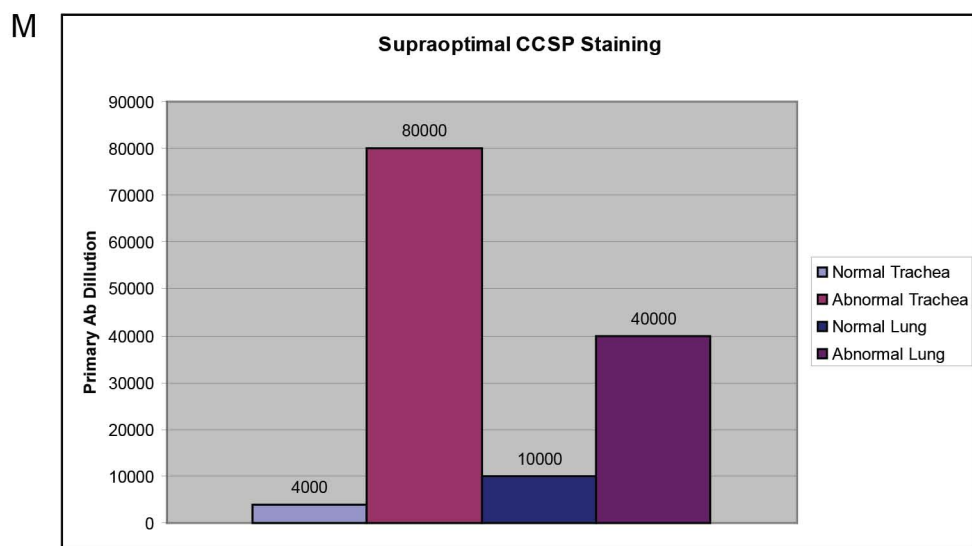

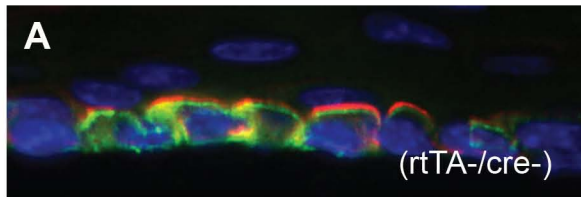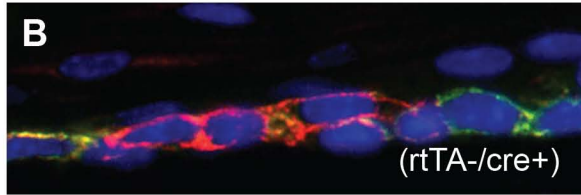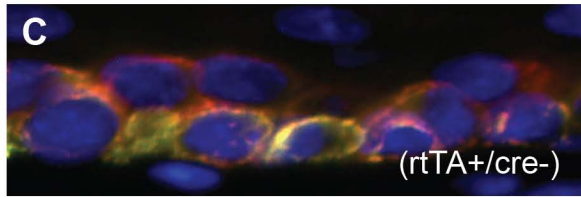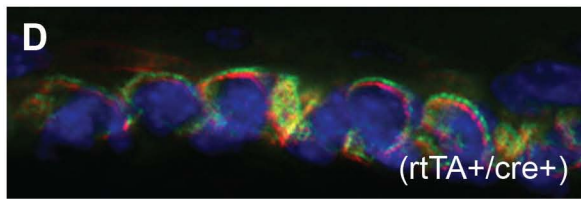

Bronchial

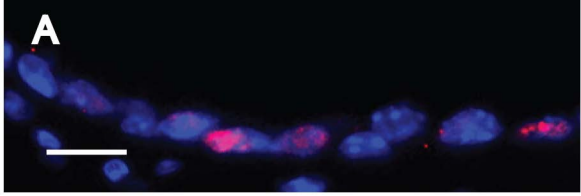

Terminal  
Bronchiolar

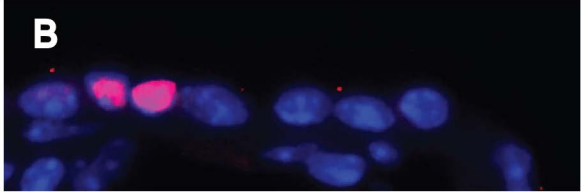

Lanes

1 2 3 4 5

6 7 8 9 10

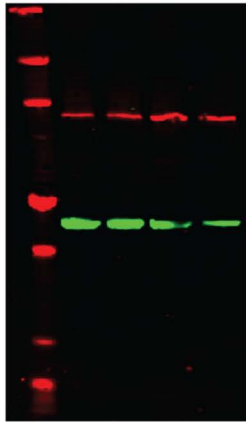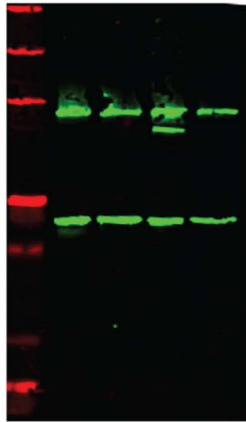

WT  $\beta$ -catenin  
DE3  $\beta$ -catenin  
Actin

# Whole Trachea Ki67 Frequency

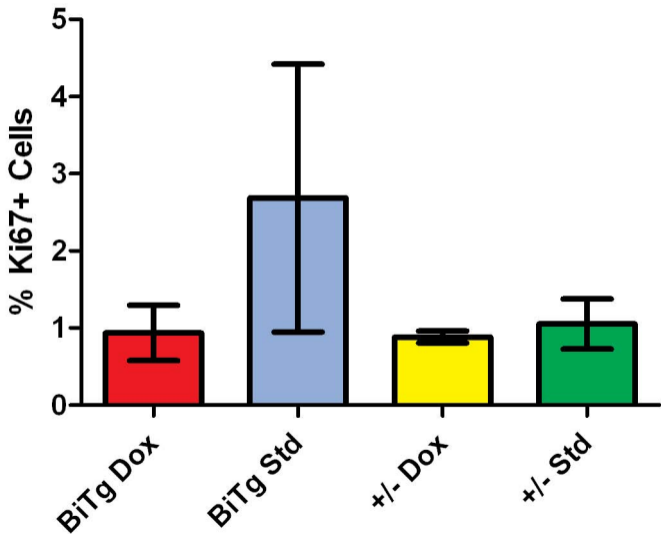

Supplement: supp_46.1.115_Smith_ODS_suppl_figs_1_-_5.pdf [file supp_46.1.115_Smith_ODS_suppl_figs_1_-_5.pdf]
